# Supplementary material for: A Novel Point-of-Care Prediction Model for Steatotic Liver Disease: Expected Role of Mass Screening in the Global Obesity Crisis
Source: PubMed Central journal article supplement — Gut Liver. 2025 Jan 8;19(1):126–35. doi: 10.5009/gnl240367 (PMC11736326; doi:10.5009/gnl240367), 2025-01-08
Supplement: gnl-19-1-126-supple.pdf [file gnl-19-1-126-supple.pdf]

## SUPPLEMENTARY METHODS

### 1. Definitions and assessments

Height and body weight were assessed using a digital scale, and body mass index (BMI) was calculated through the formula:  $\text{BMI} = \text{body weight (kg)} / \text{height squared (m}^2\text{)}$ . Waist circumference was measured by a trained examiner using a tape measure to the nearest millimeter at the midpoint between the lower margin of the least palpable rib and the top of the iliac crest. Systolic and diastolic blood pressures were measured twice in one day, and their mean values were used for this study. The definition of hypertension is a systolic blood pressure  $\geq 140$  mm Hg and/or a diastolic blood pressure  $\geq 90$  mm Hg, or when taking antihypertensive medication. Type 2 diabetes mellitus (DM) is defined as a fasting blood sugar  $\geq 126$  mg/dL, hemoglobin A1c (HbA1c)  $\geq 6.5\%$ , or when taking DM medication. Dyslipidemia is defined as a plasma triglyceride  $\geq 150$  mg/dL, plasma high density lipoprotein cholesterol  $\leq 40$  mg/dL for men and  $\leq 50$  mg/dL for women, or taking lipid lowering treatment.

### 2. Diagnostic criteria for NAFLD

To define nonalcoholic fatty liver disease (NAFLD), two key criteria must be met: (1) the presence of hepatic steatosis, confirmed through either imaging or histology, and (2) the absence of secondary factors responsible for hepatic fat accumulation, such as considerable alcohol consumption, prolonged usage of steatogenic medications, or underlying monogenic hereditary disorders.

### 3. Diagnostic criteria for MAFLD

To diagnose metabolic dysfunction-associated fatty liver disease (MAFLD), hepatic steatosis is confirmed through evidence of liver fat accumulation using histological (biopsy), imaging, or blood biomarkers. Alongside this, one of the three subsequent criteria must be fulfilled: overweight/obesity, the presence of type 2 DM, or signs of metabolic dysregulation. This dysregulation is characterized by the existence of at least two metabolic risk abnormalities as described below.

- Waist circumference  $\geq 90/80$  cm in Asian men and women
- Blood pressure  $\geq 130/85$  mm Hg or specific drug treatment
- Plasma triglycerides  $\geq 150$  mg/dL ( $\geq 1.70$  mmol/L) or specific drug treatment
- Plasma high density lipoprotein cholesterol  $< 40$  mg/dL ( $< 1.0$  mmol/L) for men and  $< 50$  mg/dL ( $< 1.3$  mmol/L) for women or specific drug treatment
- Prediabetes (i.e., fasting glucose levels 100 to 125 mg/dL [5.6 to 6.9 mmol/L] or 2-hour post-load glucose levels 140 to 199 mg/dL [7.8 to 11.0 mmol] or HbA1c 5.7% to 6.4% [39 to 47 mmol/mol])
- Homeostasis model assessment of insulin resistance score  $\geq 2.5$
- Plasma high-sensitivity C-reactive protein level  $> 2$  mg/L

### 4. Diagnostic criteria for MASLD

A diagnosis of metabolic dysfunction-associated steatotic liver disease (MASLD) can be established when hepatic steatosis is detected and at least one of the described cardiovascular metabolic risk factors below is identified, provided there are no other causes of hepatic steatosis.

- BMI  $\geq 23$  kg/m<sup>2</sup> or waist circumference  $\geq 90/80$  cm in Asian men and women
- Fasting serum glucose  $\geq 100$  mg/dL (5.6 mmol/L) or 2-hour post-load glucose levels  $\geq 140$  mg/dL (7.8 mmol/L) or HbA1c 5.7% (39 mmol/L) or type 2 diabetes or treatment for type 2 diabetes
- Blood pressure  $\geq 130/85$  mm Hg or specific antihypertensive drug treatment
- Plasma triglyceride  $\geq 150$  mg/dL (1.70 mmol/L), or lipid lowering treatment
- Plasma high density lipoprotein cholesterol  $\leq 40$  mg/dL (1.0 mmol/L) for men and  $\leq 50$  mg/dL (1.3 mmol/L) for women or lipid lowering treatment

**Supplementary Table 1.** Baseline Characteristics of the NAFLD Cohort

| Variable                           | Non-NAFLD group (n=2,232) | NAFLD group (n=1,418) | p-value |
|------------------------------------|---------------------------|-----------------------|---------|
| Age, yr                            | 56.0 (47.0–65.0)          | 59.0 (52.0–67.0)      | <0.001  |
| Sex                                |                           |                       | <0.001  |
| Female                             | 1,846 (87.7)              | 947 (66.8)            |         |
| Male                               | 386 (17.3)                | 471 (33.2)            |         |
| Waist circumference, cm            | 78.0 (73.0–83.5)          | 87.0 (82.0–92.5)      | <0.001  |
| Body mass index, kg/m <sup>2</sup> | 20.9 (19.2–22.6)          | 24.2 (22.4–26.3)      | <0.001  |
| Bodyfat, kg                        | 14.8 (11.8–18.1)          | 20.2 (17.1–24.1)      | <0.001  |
| Visceral fat, cm <sup>2</sup>      | 72.8 (55.4–90.2)          | 97.7 (83.2–114.1)     | <0.001  |
| Muscle, kg                         | 20.4 (18.7–22.7)          | 22.4 (20.0–28.4)      | <0.001  |
| Diabetes mellitus                  |                           |                       | <0.001  |
| Absent                             | 1,568 (70.3)              | 654 (46.1)            |         |
| Present                            | 664 (29.7)                | 764 (53.9)            |         |
| Hypertension                       |                           |                       | <0.001  |
| Absent                             | 1,875 (84.0)              | 1,016 (71.7)          |         |
| Present                            | 357 (16.0)                | 402 (28.3)            |         |
| Dyslipidemia                       |                           |                       | <0.001  |
| Absent                             | 1,468 (65.8)              | 554 (39.1)            |         |
| Present                            | 764 (34.2)                | 864 (60.9)            |         |

Data are presented median (interquartile range) or number (%).

NAFLD, nonalcoholic fatty liver disease.

**Supplementary Table 2.** Baseline Characteristics of the MAFLD Cohort

| Variable                           | Non-MAFLD group (n=2,442) | MAFLD group (n=1,208) | p-value |
|------------------------------------|---------------------------|-----------------------|---------|
| Age, yr                            | 56.0 (47.0–65.0)          | 60.0 (52.0–68.0)      | <0.001  |
| Sex                                |                           |                       | <0.001  |
| Female                             | 2,014 (82.5)              | 779 (64.5)            |         |
| Male                               | 428 (17.5)                | 429 (35.5)            |         |
| Waist circumference, cm            | 78.0 (73.0–83.0)          | 88.3 (84.0–93.6)      | <0.001  |
| Body mass index, kg/m <sup>2</sup> | 20.9 (19.3–22.5)          | 24.8 (23.3–26.7)      | <0.001  |
| Bodyfat, kg                        | 15.0 (12.0–18.2)          | 21.0 (17.9–25.1)      | <0.001  |
| Visceral fat, cm <sup>2</sup>      | 73.4 (56.2–90.0)          | 101.2 (87.1–117.8)    | <0.001  |
| Muscle, kg                         | 20.4 (18.7–22.7)          | 22.9 (20.3–29.2)      | <0.001  |
| Diabetes mellitus                  |                           |                       | <0.001  |
| Absent                             | 1,778 (72.8)              | 444 (36.8)            |         |
| Present                            | 664 (27.2)                | 764 (63.2)            |         |
| Hypertension                       |                           |                       | <0.001  |
| Absent                             | 2,074 (84.9)              | 817 (67.6)            |         |
| Present                            | 368 (15.1)                | 391 (32.4)            |         |
| Dyslipidemia                       |                           |                       | <0.001  |
| Absent                             | 1,602 (65.6)              | 420 (34.8)            |         |
| Present                            | 840 (34.4)                | 788 (65.2)            |         |

Data are presented median (interquartile range) or number (%).

MAFLD, metabolic dysfunction-associated fatty liver disease.

**Supplementary Table 3.** Baseline Characteristics of the MASLD Cohort

| Variable                           | Non-MASLD group (n=2,345) | MASLD group (n=1,305) | p-value |
|------------------------------------|---------------------------|-----------------------|---------|
| Age, yr                            | 56.0 (47.0–65.0)          | 60.0 (52.0–68.0)      | <0.001  |
| Sex                                |                           |                       | <0.001  |
| Female                             | 1,935 (82.5)              | 858 (65.7)            |         |
| Male                               | 410 (17.5)                | 447 (34.3)            |         |
| Waist circumference, cm            | 78.0 (73.0–83.0)          | 88.0 (83.0–93.0)      | <0.001  |
| Body mass index, kg/m <sup>2</sup> | 20.9 (19.3–22.6)          | 24.5 (22.9–26.4)      | <0.001  |
| Bodyfat, kg                        | 14.8 (11.9–18.1)          | 20.5 (17.5–24.5)      | <0.001  |
| Visceral fat, cm <sup>2</sup>      | 73.0 (55.6–90.0)          | 99.4 (85.2–116.1)     | <0.001  |
| Muscle, kg                         | 20.4 (18.7–22.7)          | 22.6 (20.1–28.7)      | <0.001  |
| Diabetes mellitus                  |                           |                       | <0.001  |
| Absent                             | 1,681 (71.7)              | 541 (41.5)            |         |
| Present                            | 664 (28.3)                | 764 (58.5)            |         |
| Hypertension                       |                           |                       | <0.001  |
| Absent                             | 1,988 (84.8)              | 903 (69.2)            |         |
| Present                            | 357 (15.2)                | 402 (30.8)            |         |
| Dyslipidemia                       |                           |                       | <0.001  |
| Absent                             | 1,581 (67.4)              | 441 (33.8)            |         |
| Present                            | 764 (32.6)                | 864 (66.2)            |         |

Data are presented median (interquartile range) or number (%).  
MASLD, metabolic dysfunction-associated steatotic liver disease.

**Supplementary Table 4.** Predictive Values of Steatotic Liver Disease in the NAFLD, MAFLD, and MASLD Cohorts: In Model 1\*

| Variable                              | Low cutoff point (<330) | Intermediate (330–400) | High cutoff point (>400) | Total No. |
|---------------------------------------|-------------------------|------------------------|--------------------------|-----------|
| <b>NAFLD</b>                          |                         |                        |                          |           |
| Total                                 | 1,281 (35.1)            | 1,815 (49.7)           | 554 (15.2)               | 3,650     |
| Steatotic liver disease               | 147 (10.4)              | 832 (45.8)             | 439 (79.2)               | 1,418     |
| Sensitivity, % (95% CI)               | 89.6 (88.0–91.2)        |                        | 31.0 (28.6–33.4)         |           |
| Specificity, % (95% CI)               | 50.8 (48.7–52.9)        |                        | 94.8 (93.9–95.8)         |           |
| Positive likelihood ratio, (95% CI)   | 1.822 (1.741–1.907)     |                        | 6.009 (4.948–7.297)      |           |
| Negative likelihood ratio, (95% CI)   | 0.204 (0.174–0.239)     |                        | 0.728 (0.702–0.755)      |           |
| Positive predictive value, % (95% CI) |                         |                        | 79.2 (75.9–82.6)         |           |
| Negative predictive value, % (95% CI) | 88.5 (86.8–90.3)        |                        |                          |           |
| <b>MAFLD</b>                          |                         |                        |                          |           |
| Total                                 | 1,281 (35.1)            | 1,814 (49.7)           | 555 (15.2)               | 3,650     |
| Steatotic liver disease               | 50 (3.9)                | 718 (39.6)             | 440 (79.3)               | 1,208     |
| Sensitivity, % (95% CI)               | 95.9 (94.7–97.0)        |                        | 36.4 (33.7–39.1)         |           |
| Specificity, % (95% CI)               | 50.4 (48.4–52.4)        |                        | 95.3 (94.5–96.1)         |           |
| Positive likelihood ratio, (95% CI)   | 1.933 (1.854–2.015)     |                        | 7.735 (6.375–9.384)      |           |
| Negative likelihood ratio, (95% CI)   | 0.082 (0.062–0.108)     |                        | 0.667 (0.639–0.697)      |           |
| Positive predictive value, % (95% CI) |                         |                        | 79.3 (75.9–82.7)         |           |
| Negative predictive value, % (95% CI) | 96.1 (95.0–97.2)        |                        |                          |           |
| <b>MASLD</b>                          |                         |                        |                          |           |
| Total                                 | 1,281 (35.1)            | 1,815 (49.7)           | 554 (15.2)               | 3,650     |
| Steatotic liver disease               | 88 (6.8)                | 823 (45.3)             | 439 (79.2)               | 1,350     |
| Sensitivity, % (95% CI)               | 93.3 (91.9–94.6)        |                        | 33.6 (31.1–36.2)         |           |
| Specificity, % (95% CI)               | 50.9 (48.9–52.9)        |                        | 95.1 (94.2–96.0)         |           |
| Positive likelihood ratio, (95% CI)   | 1.898 (1.817–1.983)     |                        | 6.860 (5.651–8.327)      |           |
| Negative likelihood ratio, (95% CI)   | 0.133 (0.108–0.163)     |                        | 0.698 (0.671–0.726)      |           |
| Positive predictive value, % (95% CI) |                         |                        | 79.2 (75.9–82.6)         |           |
| Negative predictive value, % (95% CI) | 93.1 (91.7–94.5)        |                        |                          |           |

Data are presented as number (%) unless indicated otherwise.

NAFLD, nonalcoholic fatty liver disease; MAFLD, metabolic dysfunction-associated fatty liver disease; MASLD, metabolic dysfunction-associated steatotic liver disease; CI, confidence interval.

\*Model 1: age+13×body mass index (+3, if male; +3, if diabetes mellitus; +2, if dyslipidemia).

**Supplementary Table 5.** Predictive Values of Steatotic Liver Disease in the NAFLD, MAFLD, and MASLD Cohorts: In Model 2\*

| Variable                              | Low cutoff point (<100) | Intermediate (100–125) | High cutoff point (>125) | Total No. |
|---------------------------------------|-------------------------|------------------------|--------------------------|-----------|
| <b>NAFLD</b>                          |                         |                        |                          |           |
| Total                                 | 1,418 (38.8)            | 1,823 (49.5)           | 409 (11.2)               | 3,650     |
| Steatotic liver disease               | 176 (12.4)              | 903 (49.8)             | 339 (82.9)               | 1,418     |
| Sensitivity, % (95% CI)               | 87.6 (85.9–89.3)        |                        | 23.9 (21.7–26.1)         |           |
| Specificity, % (95% CI)               | 55.6 (53.6–57.7)        |                        | 96.9 (96.1–97.6)         |           |
| Positive likelihood ratio, (95% CI)   | 1.975 (1.878–2.077)     |                        | 7.623 (5.945–9.774)      |           |
| Negative likelihood ratio, (95% CI)   | 0.223 (0.193–0.257)     |                        | 0.786 (0.762–0.810)      |           |
| Positive predictive value, % (95% CI) |                         |                        | 82.9 (79.2–86.5)         |           |
| Negative predictive value, % (95% CI) | 87.6 (85.9–89.3)        |                        |                          |           |
| <b>MAFLD</b>                          |                         |                        |                          |           |
| Total                                 | 1,418 (38.8)            | 1,823 (49.9)           | 409 (11.2)               | 3,650     |
| Steatotic liver disease               | 77 (5.4)                | 782 (42.9)             | 339 (82.9)               | 1,208     |
| Sensitivity, % (95% CI)               | 93.6 (92.2–95.0)        |                        | 28.1 (25.5–30.6)         |           |
| Specificity, % (95% CI)               | 54.9 (52.9–56.9)        |                        | 97.1 (96.5–97.8)         |           |
| Positive likelihood ratio, (95% CI)   | 2.077 (1.983–2.175)     |                        | 9.790 (7.640–12.544)     |           |
| Negative likelihood ratio, (95% CI)   | 0.116 (0.093–0.145)     |                        | 0.741 (0.715–0.768)      |           |
| Positive predictive value, % (95% CI) |                         |                        | 82.9 (79.2–86.5)         |           |
| Negative predictive value, % (95% CI) | 94.6 (93.4–95.7)        |                        |                          |           |
| <b>MASLD</b>                          |                         |                        |                          |           |
| Total                                 | 1,418 (38.8)            | 1,823 (49.9)           | 409 (11.2)               | 3,650     |
| Steatotic liver disease               | 116 (8.2)               | 895 (49.1)             | 339 (82.9)               | 1,350     |
| Sensitivity, % (95% CI)               | 91.1 (89.6–92.7)        |                        | 26.0 (23.6–28.4)         |           |
| Specificity, % (95% CI)               | 55.5 (53.5–57.5)        |                        | 97.0 (96.3–97.7)         |           |
| Positive likelihood ratio, (95% CI)   | 2.048 (1.952–2.150)     |                        | 8.702 (6.789–11.154)     |           |
| Negative likelihood ratio, (95% CI)   | 0.160 (0.134–0.191)     |                        | 0.763 (0.738–0.789)      |           |
| Positive predictive value, % (95% CI) |                         |                        | 82.9 (79.2–86.5)         |           |
| Negative predictive value, % (95% CI) | 91.8 (90.4–93.2)        |                        |                          |           |

Data are presented as number (%) unless indicated otherwise.

NAFLD, nonalcoholic fatty liver disease; MAFLD, metabolic dysfunction-associated fatty liver disease; MASLD, metabolic dysfunction-associated steatotic liver disease; CI, confidence interval.

\*Model 2: 4.5×body mass index+3.5×body fat mass per muscle mass (+4, if male; +1.5, if diabetes mellitus; +1, if dyslipidemia).

**Supplementary Table 6.** Predictive Values of Steatotic Liver Disease in the NAFLD, MAFLD, and MASLD Cohorts: In Model 3\*

| Variable                              | Low cutoff point (<125) | Intermediate (125–155) | High cutoff point (>155) | Total No. |
|---------------------------------------|-------------------------|------------------------|--------------------------|-----------|
| <b>NAFLD</b>                          |                         |                        |                          |           |
| Total                                 | 1,357 (37.2)            | 1,815 (47.5)           | 478 (13.1)               | 3,650     |
| Steatotic liver disease               | 163 (12.0)              | 862 (49.8)             | 393 (82.2)               | 1,418     |
| Sensitivity, % (95% CI)               | 88.5 (86.8–90.2)        |                        | 27.7 (25.4–30.0)         |           |
| Specificity, % (95% CI)               | 53.5 (51.4–55.6)        |                        | 96.2 (95.4–97.0)         |           |
| Positive likelihood ratio, (95% CI)   | 1.903 (1.813–1.997)     |                        | 7.278 (5.812–9.112)      |           |
| Negative likelihood ratio, (95% CI)   | 0.215 (0.185–0.250)     |                        | 0.751 (0.727–0.777)      |           |
| Positive predictive value, % (95% CI) |                         |                        | 82.2 (78.8–85.6)         |           |
| Negative predictive value, % (95% CI) | 88.0 (86.3–89.7)        |                        |                          |           |
| <b>MAFLD</b>                          |                         |                        |                          |           |
| Total                                 | 1,357 (37.2)            | 1,815 (41.3)           | 478 (11.1)               | 3,650     |
| Steatotic liver disease               | 66 (4.9)                | 749 (41.3)             | 393 (82.2)               | 1,208     |
| Sensitivity, % (95% CI)               | 94.5 (93.0–95.8)        |                        | 32.5 (29.9–35.2)         |           |
| Specificity, % (95% CI)               | 52.9 (50.9–54.8)        |                        | 96.5 (95.8–97.2)         |           |
| Positive likelihood ratio, (95% CI)   | 2.006 (1.919–2.096)     |                        | 9.347 (7.470–11.694)     |           |
| Negative likelihood ratio, (95% CI)   | 0.103 (0.081–0.131)     |                        | 0.699 (0.672–0.727)      |           |
| Positive predictive value, % (95% CI) |                         |                        | 82.2 (78.8–85.6)         |           |
| Negative predictive value, % (95% CI) | 95.1 (94.0–96.3)        |                        |                          |           |
| <b>MASLD</b>                          |                         |                        |                          |           |
| Total                                 | 1,357 (37.2)            | 1,815 (49.7)           | 478 (13.1)               | 3,650     |
| Steatotic liver disease               | 106 (7.8)               | 851 (63.0)             | 393 (82.2)               | 1,350     |
| Sensitivity, % (95% CI)               | 91.9 (90.4–93.4)        |                        | 30.1 (27.6–32.6)         |           |
| Specificity, % (95% CI)               | 53.3 (51.3–55.4)        |                        | 96.4 (95.6–97.1)         |           |
| Positive likelihood ratio, (95% CI)   | 1.969 (1.881–2.063)     |                        | 8.308 (6.638–10.399)     |           |
| Negative likelihood ratio, (95% CI)   | 0.152 (0.126–0.183)     |                        | 0.725 (0.699–0.752)      |           |
| Positive predictive value, % (95% CI) |                         |                        | 82.2 (78.8–85.6)         |           |
| Negative predictive value, % (95% CI) | 92.2 (90.8–93.6)        |                        |                          |           |

Data are presented as number (%) unless indicated otherwise.

NAFLD, nonalcoholic fatty liver disease; MAFLD, metabolic dysfunction-associated fatty liver disease; MASLD, metabolic dysfunction-associated steatotic liver disease; CI, confidence interval.

\*Model 3:  $5.5 \times \text{body mass index} + 2.0 \times \text{visceral fat area per muscle mass}$  (+3, if male; +1.5, if diabetes mellitus; +1, if dyslipidemia).

**Supplementary Table 7.** Baseline Characteristics of the External Validation Cohort

| Variable                           | Non-SLD group (n=149,214) | SLD group (n=79,948) | p-value |
|------------------------------------|---------------------------|----------------------|---------|
| Age, yr                            | 41.5 (35.9–47.3)          | 44.0 (38.8–49.6)     | <0.001  |
| Sex                                |                           |                      | <0.001  |
| Female                             | 85,634 (57.4)             | 16,495 (20.6)        |         |
| Male                               | 63,580 (42.6)             | 63,453 (79.6)        |         |
| Waist circumference, cm            | 77.4 (71.4–83.4)          | 89.0 (84.2–94.5)     | <0.001  |
| Body mass index, kg/m <sup>2</sup> | 22.2 (20.4–24.1)          | 26.0 (24.2–28.2)     | <0.001  |
| Bodyfat, kg                        | 15.5 (12.7–18.8)          | 20.9 (17.4–25.5)     | <0.001  |
| Visceral fat, cm <sup>2</sup>      | 65.4 (52.9–83.4)          | 90.3 (73.3–115.6)    | <0.001  |
| Muscle, kg                         | 23.5 (20.5–30.5)          | 31.5 (27.6–34.6)     | <0.001  |
| Diabetes mellitus                  |                           |                      | <0.001  |
| Absent                             | 144,250 (96.7)            | 69,193 (86.5)        |         |
| Present                            | 4,964 (3.3)               | 10,755 (13.5)        |         |
| Hypertension                       |                           |                      | <0.001  |
| Absent                             | 134,101 (89.9)            | 61,717 (77.2)        |         |
| Present                            | 15,113 (10.1)             | 18,231 (22.8)        |         |
| Dyslipidemia                       |                           |                      | <0.001  |
| Absent                             | 120,660 (80.9)            | 34,946 (43.7)        |         |
| Present                            | 28,554 (19.1)             | 45,002 (56.3)        |         |
| Alcohol consumption                |                           |                      | <0.001  |
| Below threshold*                   | 135,970 (91.1)            | 69,777 (87.3)        |         |
| Above threshold*                   | 13,244 (8.9)              | 10,171 (12.7)        |         |

Data are presented as median (interquartile range) or number (%).

SLD, steatotic liver disease.

\*140 g/wk for females and 210 g/wk for males.



**Supplementary Table 8.** Predictive Values of Steatotic Liver Disease in the External Validation Cohort int the Model 1\*

| The external validation cohort        | Low cutoff point (<330) | Intermediate (330–400) | High cutoff point (>400) | Total No. |
|---------------------------------------|-------------------------|------------------------|--------------------------|-----------|
| Total                                 | 73,968 (32.3)           | 117,729 (51.4)         | 37,465 (16.3)            | 229,162   |
| Steatotic liver disease               | 3,575 (4.8)             | 46,483 (39.5)          | 29,890 (79.8)            | 79,948    |
| Sensitivity, % (95% CI)               | 95.5 (95.4–95.7)        |                        | 37.4 (37.1–37.7)         |           |
| Specificity, % (95% CI)               | 47.2 (46.9–47.4)        |                        | 94.9 (94.8–95.0)         |           |
| Positive likelihood ratio, (95% CI)   | 1.808 (1.799–1.818)     |                        | 7.365 (7.192–7.541)      |           |
| Negative likelihood ratio, (95% CI)   | 0.095 (0.092–0.098)     |                        | 0.660 (0.656–0.663)      |           |
| Positive predictive value, % (95% CI) |                         |                        | 79.8 (79.4–80.2)         |           |
| Negative predictive value, % (95% CI) | 95.2 (95.0–95.3)        |                        |                          |           |

Data are presented as number (%) or unless indicated otherwise.

CI, confidence interval.

\*Model 1: age+13×body mass index (+3, if male; +3, if diabetes mellitus; +2, if dyslipidemia).

**Supplementary Table 9.** Predictive Values of Steatotic Liver Disease in the External Validation Cohort into the Model 2\*

| The external validation cohort        | Low cutoff point (<100) | Intermediate (100–125) | High cutoff point (>125) | Total No. |
|---------------------------------------|-------------------------|------------------------|--------------------------|-----------|
| Total                                 | 72,253 (31.5)           | 120,641 (52.6)         | 36,268 (15.8)            | 229,162   |
| Steatotic liver disease               | 3,440 (4.8)             | 47,273 (39.2)          | 29,235 (80.6)            | 79,948    |
| Sensitivity, % (95% CI)               | 95.7 (95.6–95.8)        |                        | 36.6 (36.2–36.9)         |           |
| Specificity, % (95% CI)               | 46.1 (45.9–46.4)        |                        | 95.3 (95.2–95.4)         |           |
| Positive likelihood ratio, (95% CI)   | 1.829 (1.818–1.839)     |                        | 7.758 (7.570–7.951)      |           |
| Negative likelihood ratio, (95% CI)   | 0.091 (0.088–0.095)     |                        | 0.666 (0.662–0.669)      |           |
| Positive predictive value, % (95% CI) |                         |                        | 80.6 (80.2–81.0)         |           |
| Negative predictive value, % (95% CI) | 95.2 (95.1–95.4)        |                        |                          |           |

Data are presented as number (%) unless indicated otherwise.

CI, confidence interval.

\*Model 2:  $4.5 \times \text{body mass index} + 3.5 \times \text{body fat mass per muscle mass}$  (+4, if male; +1.5, if diabetes mellitus; +1, if dyslipidemia).

**Supplementary Table 10.** Predictive Values of Steatotic Liver Disease in the External Validation Cohort int the Model 3\*

| The external validation cohort        | Low cutoff point (<125) | Intermediate (125–155) | High cutoff point (>155) | Total No. |
|---------------------------------------|-------------------------|------------------------|--------------------------|-----------|
| Total                                 | 61,715 (26.9)           | 121,230 (52.9)         | 46,217 (20.2)            | 229,162   |
| Steatotic liver disease               | 2,406 (3.9)             | 42,270 (34.9)          | 35,272 (76.3)            | 79,948    |
| Sensitivity, % (95% CI)               | 97.0 (96.9–97.1)        |                        | 44.1 (43.8–44.5)         |           |
| Specificity, % (95% CI)               | 39.7 (39.5–40.0)        |                        | 92.7 (92.5–92.8)         |           |
| Positive likelihood ratio, (95% CI)   | 1.610 (1.603–1.617)     |                        | 6.015 (5.898–6.134)      |           |
| Negative likelihood ratio, (95% CI)   | 0.076 (0.073–0.079)     |                        | 0.603 (0.599–0.607)      |           |
| Positive predictive value, % (95% CI) |                         |                        | 76.3 (75.9–76.7)         |           |
| Negative predictive value, % (95% CI) | 96.1 (95.9–96.3)        |                        |                          |           |

Data are presented as number (%) unless indicated otherwise.

CI, confidence interval.

\*Model 3:  $5.5 \times \text{body mass index} + 2.0 \times \text{visceral fat area per muscle mass}$  (+3, if male; +1.5, if diabetes mellitus; +1, if dyslipidemia).

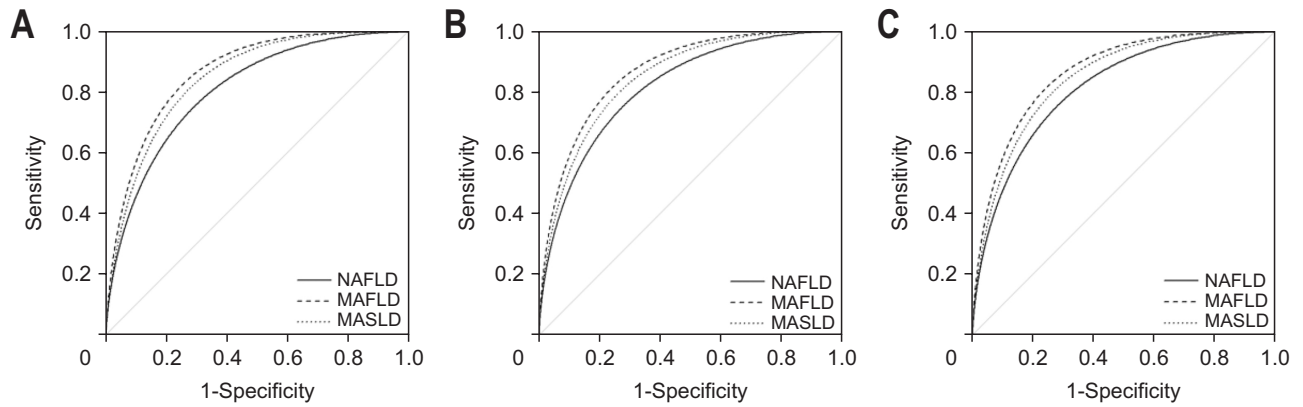

**Supplementary Fig. 1.** Receiver operating characteristic curve of prediction model for detecting NAFLD, MAFLD, and MASLD. (A) The AUROC was 0.811 (95% CI, 0.797 to 0.825) for NAFLD, 0.870 (95% CI, 0.859 to 0.882) for MAFLD, and 0.845 (95% CI, 0.832 to 0.857) for MASLD detection in SLD model 1. (B) The AUROC was 0.820 (95% CI, 0.806 to 0.834) for NAFLD, 0.875 (95% CI, 0.864 to 0.887) for MAFLD, and 0.851 (95% CI, 0.838 to 0.863) for MASLD detection in SLD model 2. (C) The AUROC was 0.819 (95% CI, 0.806 to 0.833) for NAFLD, 0.874 (95% CI, 0.862 to 0.885) for MAFLD, and 0.850 (95% CI, 0.838 to 0.863) for MASLD detection in SLD model 3. NAFLD, nonalcoholic fatty liver disease; MAFLD, metabolic dysfunction-associated fatty liver disease; MASLD, metabolic dysfunction-associated steatotic liver disease; AUROC, areas under the receiver operating characteristic; CI, confidence interval; SLD, steatotic liver disease.

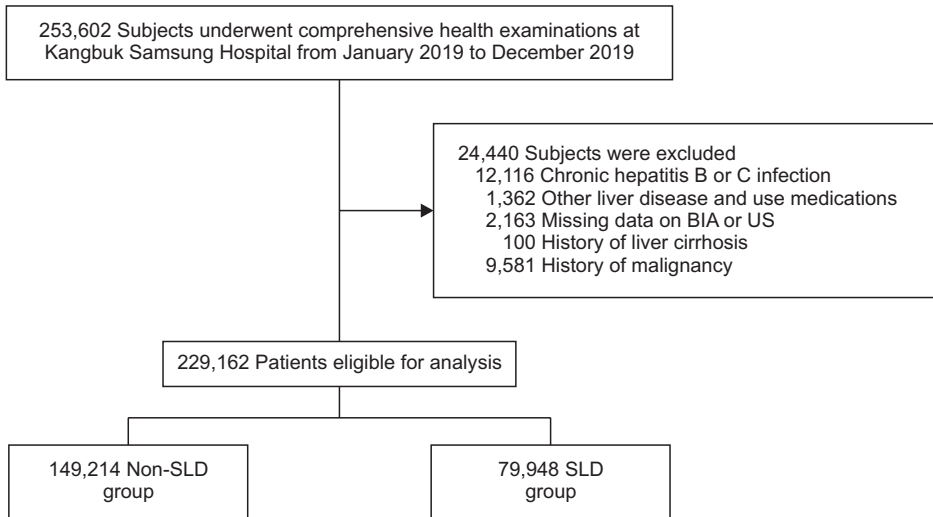

**Supplementary Fig. 2.** Flow diagram of patient selection for the external validation. Among 253,602 subjects, 24,440 were excluded due to factors potentially inducing other liver diseases. Out of the 24,440 individuals excluded, 859 met more than two of the exclusion criteria. Consequently, a total of 229,162 subjects were included in this study; 149,214 were classified into the non-SLD group, and 79,948 into the SLD group. BIA, bioelectrical impedance analysis; US, ultrasound sonography; SLD, steatotic liver disease.

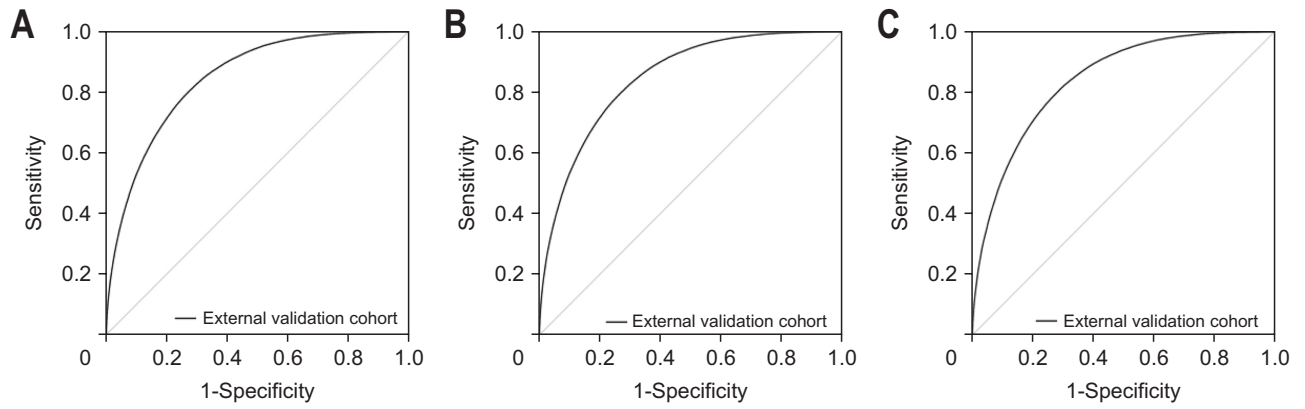

**Supplementary Fig. 3.** Receiver operating characteristic curve of prediction model for detecting SLD in the external validation cohort. The AUROC of (A) SLD model 1 was 0.847 [95% CI, 0.846 to 0.849], (B) SLD model 2 was 0.848 [95% CI, 0.846 to 0.849], and (C) SLD model 3 was 0.842 [95% CI, 0.840 to 0.844] in the external validation cohort for detecting SLD. AUROC, area under the receiver operating characteristic; SLD, steatotic liver disease; CI, confidence interval.

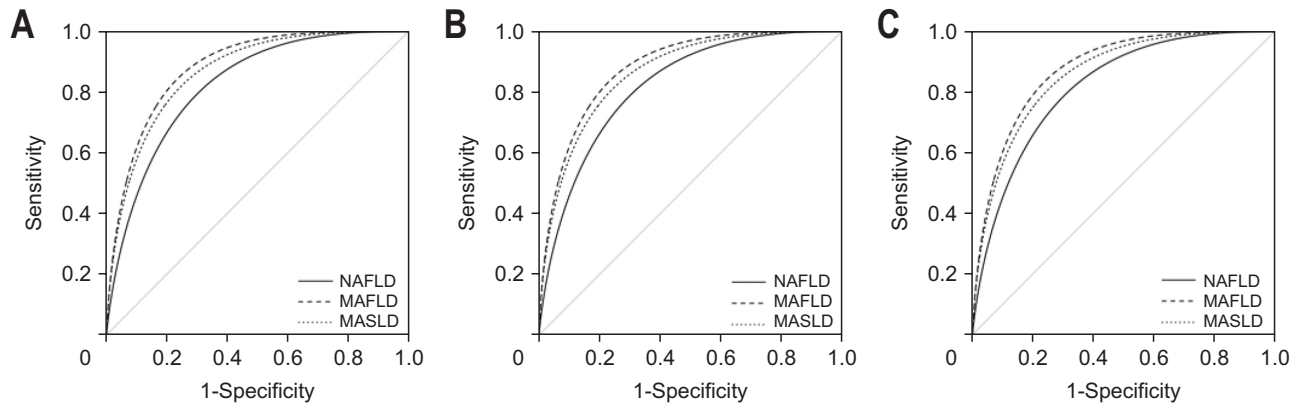

**Supplementary Fig. 4.** Receiver operating characteristic curve of prediction model for detecting NAFLD, MAFLD, and MASLD in the external validation. (A) The AUROC was 0.821 [95% CI, 0.819 to 0.822] for NAFLD, 0.878 [95% CI, 0.876 to 0.879] for MAFLD, and 0.862 [95% CI, 0.861 to 0.864] for MASLD detection in SLD model 1. (B) The AUROC was 0.820 [95% CI, 0.818 to 0.822] for NAFLD, 0.878 [95% CI, 0.877 to 0.880] for MAFLD, and 0.862 [95% CI, 0.861 to 0.864] for MASLD detection in SLD model 2. (C) The AUROC was 0.817 [95% CI, 0.815 to 0.818] for NAFLD, 0.874 [95% CI, 0.872 to 0.875] for MAFLD, and 0.857 [95% CI, 0.855 to 0.858] for MASLD detection in SLD model 3. NAFLD, nonalcoholic fatty liver disease; MAFLD, metabolic dysfunction-associated fatty liver disease; MASLD, metabolic dysfunction-associated steatotic liver disease; AUROC, areas under the receiver operating characteristic; CI, confidence interval; SLD, steatotic liver disease.

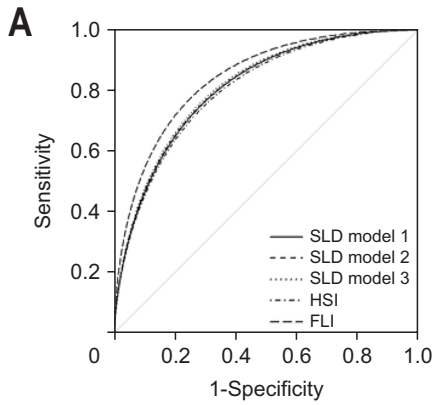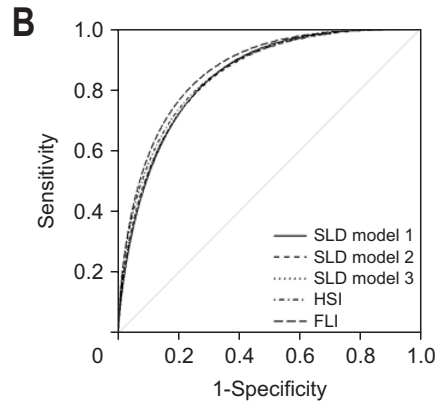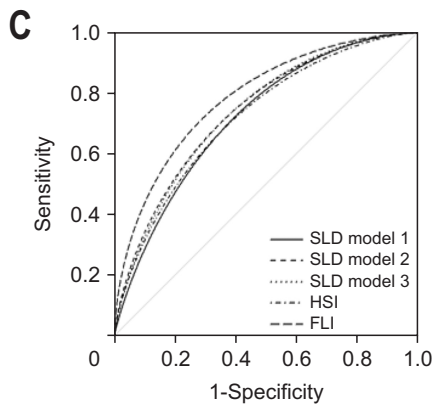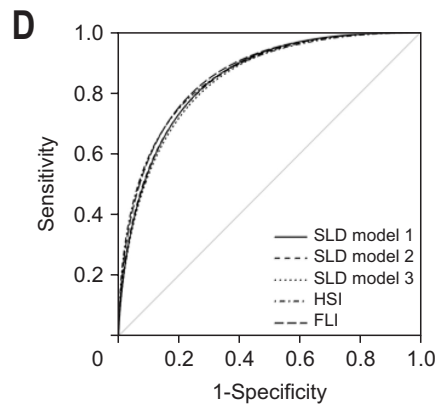

**Supplementary Fig. 5.** Comparison of HSI, FLI, and SLD models. (A) The AUROC was 0.827 [95% CI, 0.821 to 0.832] in HSI and 0.849 [95% CI, 0.844 to 0.854] in FLI prediction for SLD. (B) The AUROC was 0.864 [95% CI, 0.852 to 0.876] in HSI and 0.866 [95% CI, 0.854 to 0.877] in FLI prediction for MASLD. (C) The AUROC was 0.743 [95% CI, 0.732 to 0.754] in SLD model 1, 0.747 [95% CI, 0.736 to 0.758] in SLD model 2, 0.744 [95% CI, 0.733 to 0.756] in SLD model 3, 0.742 [95% CI, 0.730 to 0.754] in HSI, and 0.792 [95% CI, 0.781 to 0.803] in FLI prediction for lean SLD. (D) The AUROC was 0.862 [95% CI, 0.860 to 0.863] in HSI and 0.865 [95% CI, 0.863 to 0.866] in FLI prediction for SLD in the external validation. FLI, Fatty Liver Index; HSI, Hepatic Steatosis Index; SLD, steatotic liver disease; AUROC, areas under the receiver operating characteristic; CI, confidence interval; MASLD, metabolic dysfunction-associated steatotic liver disease.
